# Supplementary material for: Photoaging of polystyrene microspheres causes oxidative alterations to surface physicochemistry and enhances airway epithelial toxicity
Source: Research Square preprint supplement (doi:10.21203/rs.3.rs-1367577/v1), 2022-04-19

**Supplemental Figure 1. Total DNA Intensity Relative to Polystyrene Microsphere**  
**Treatment.** HCA analysis revealed no significant changes across dose, size, or photoaging. Modest reductions in DNA intensity in polystyrene microspheres relative to control were seen in the 72h timepoint, although the trend appeared to be an alteration in control cells across the 24, 48, and 72h timepoints, with microsphere-treated cells remaining constant.

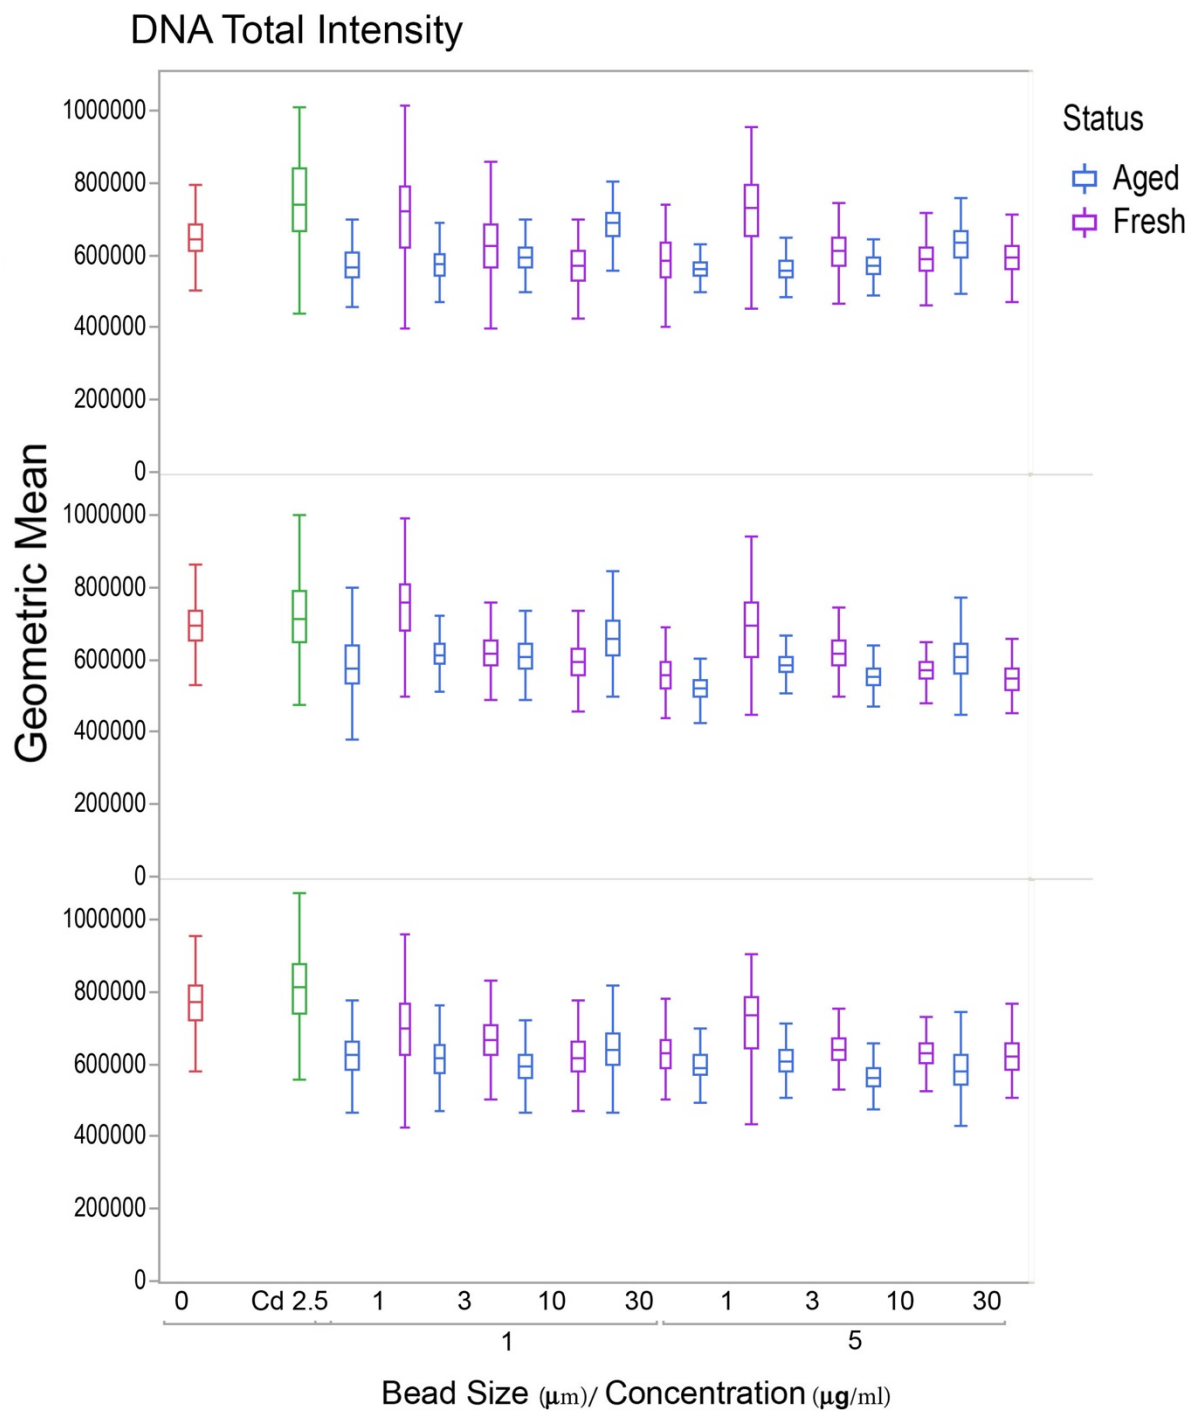

**Supplemental Figure 2. Polystyrene Microspheres Did Not Increase H2AX Staining in A549 Cells.** HCA analysis revealed no significant changes across dose, size, time, or photoaging.

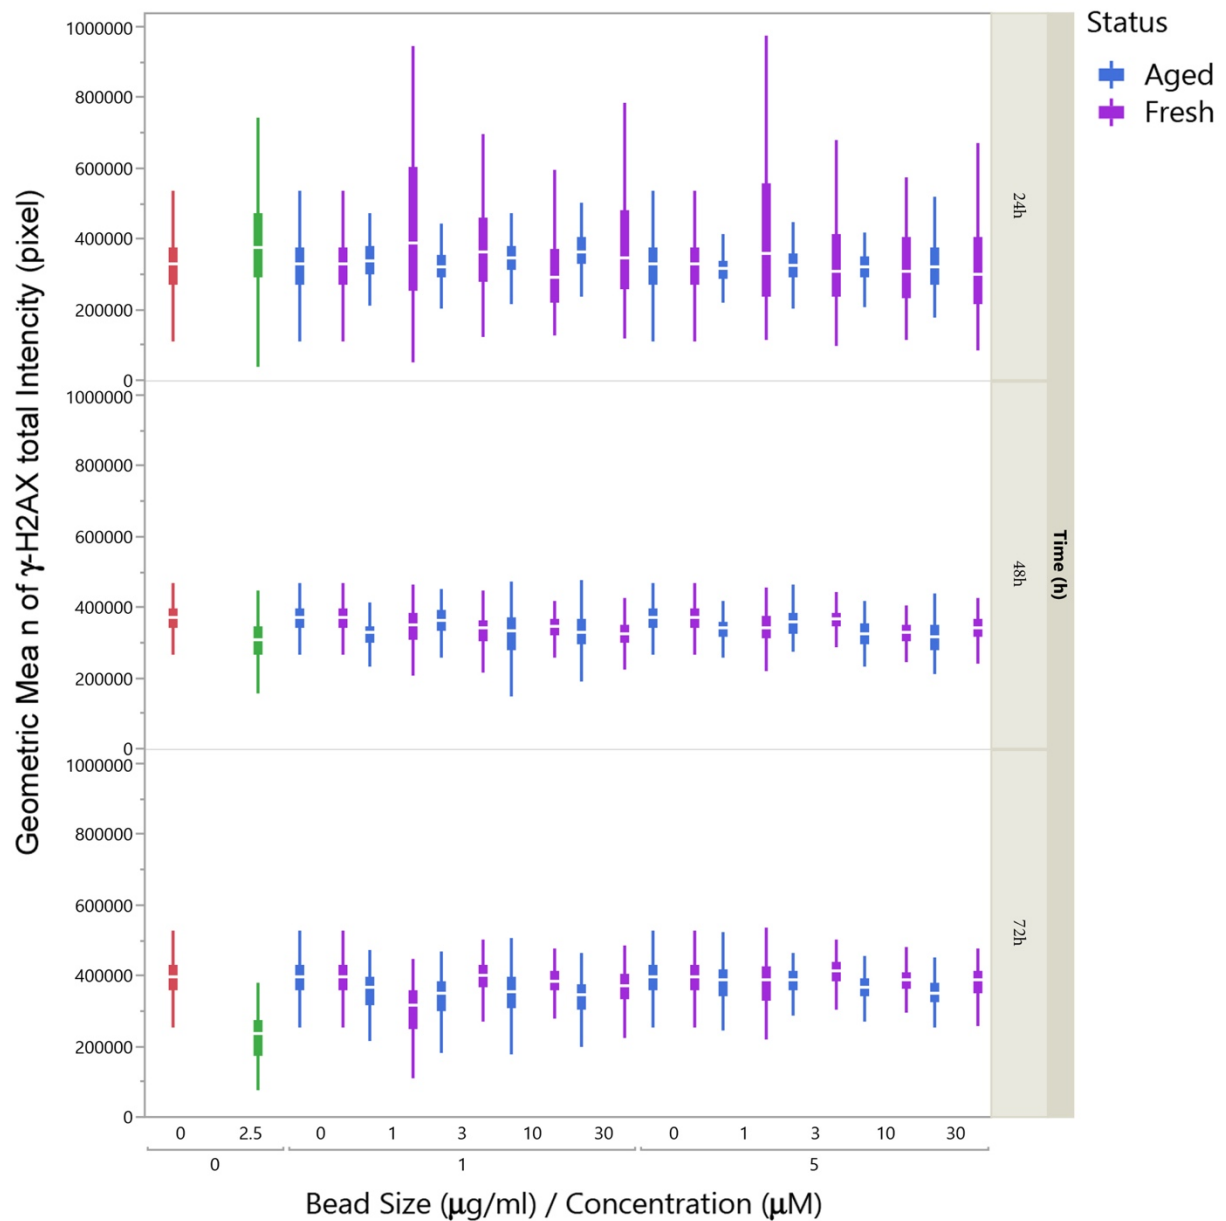

Supplement: Supplementary file 1 [file be7d294bd9fffddb97deb347.pdf]
